# Supplementary material for: A multi-resolution assessment of the Community Multiscale Air Quality (CMAQ) model v4.7 wet deposition estimates for 2002–2006
Source: Copernicus journal article supplement (doi:10.5194/gmd-4-357-2011), 2011-05-03

Figure. S8.

**Right:** Scatter plot of the ratio of observed/modeled precipitation versus the ratio of observed/modeled  $\text{NO}_3^-$  wet deposition. The colors indicate the various regions defined in Fig. S5.

**Middle:** Scatter plot of NTN observed versus CMAQ 12-km estimated  $\text{NO}_3^-$  wet deposition. The colors indicate the various regions defined in Fig. S5.

**Left:** Scatter plot NTN observed versus CMAQ 12-km estimated  $\text{NO}_3^-$  wet deposition (kg/ha) that has been adjusted for precipitation bias. The colors indicate the various regions defined in Fig. S5.

2002 : Modeled/Observed Precip. vs. Wet Dep. NO3

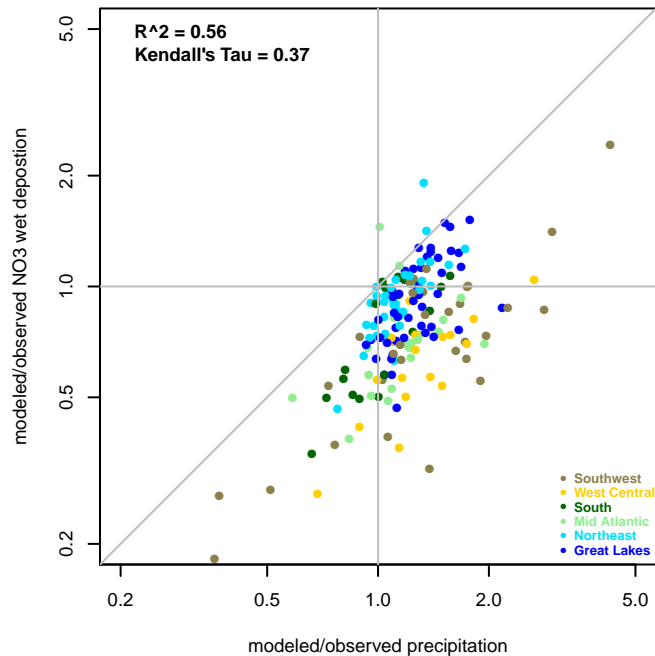

2002 : Observed vs Modeled Wet Dep. NO3

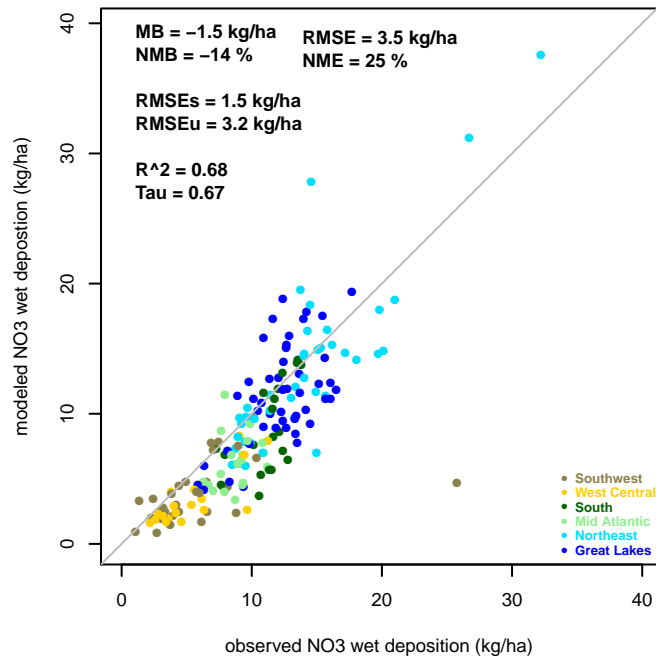

2002 : Observed vs Precip. Adjusted Wet Dep. NO3

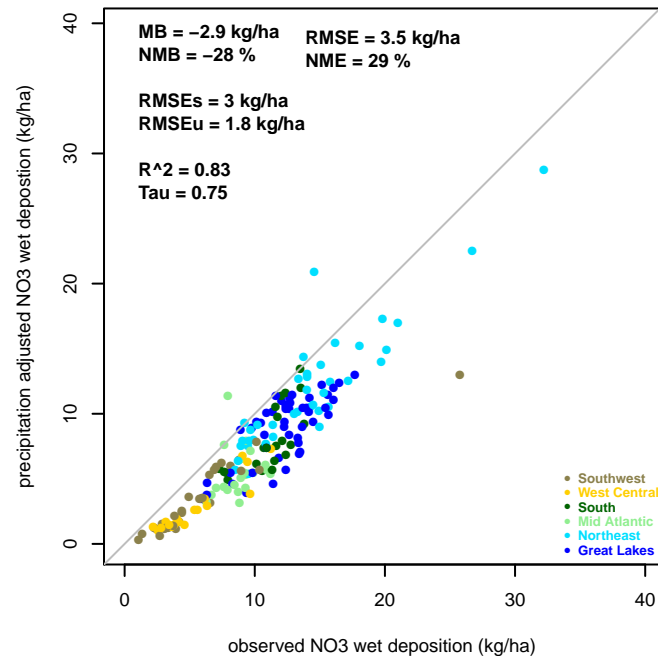

2003 : Modeled/Observed Precip. vs. Wet Dep. NO3

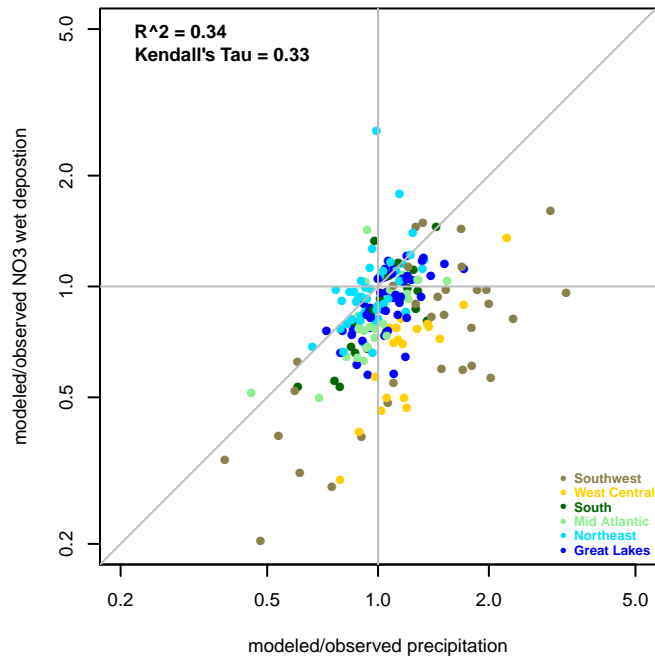

2003 : Observed vs Modeled Wet Dep. NO3

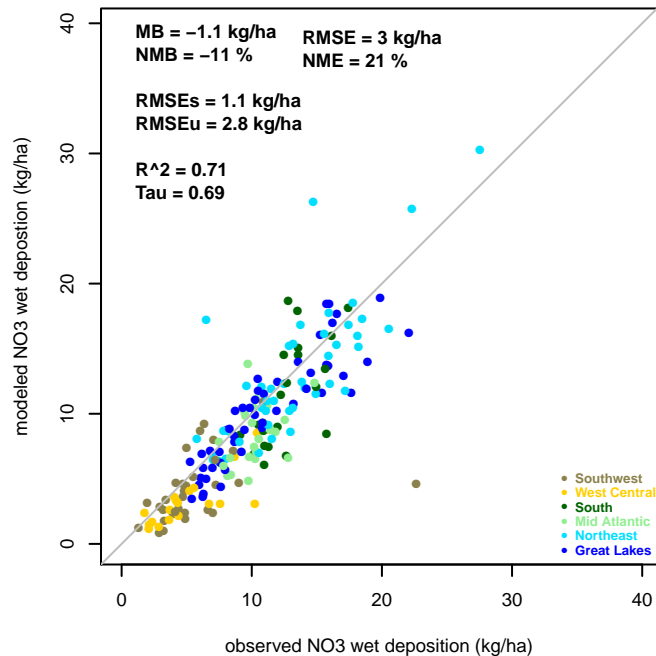

2003 : Observed vs Precip. Adjusted Wet Dep. NO3

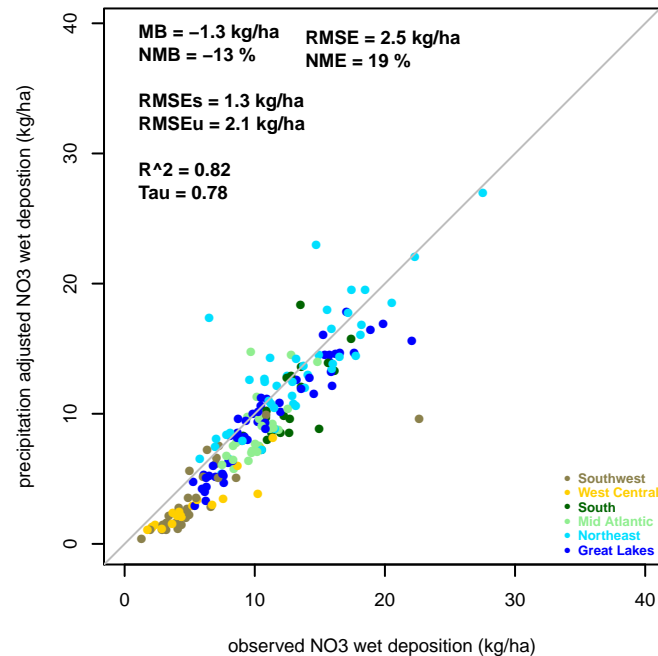

2004 : Modeled/Observed Precip. vs. Wet Dep. NO3

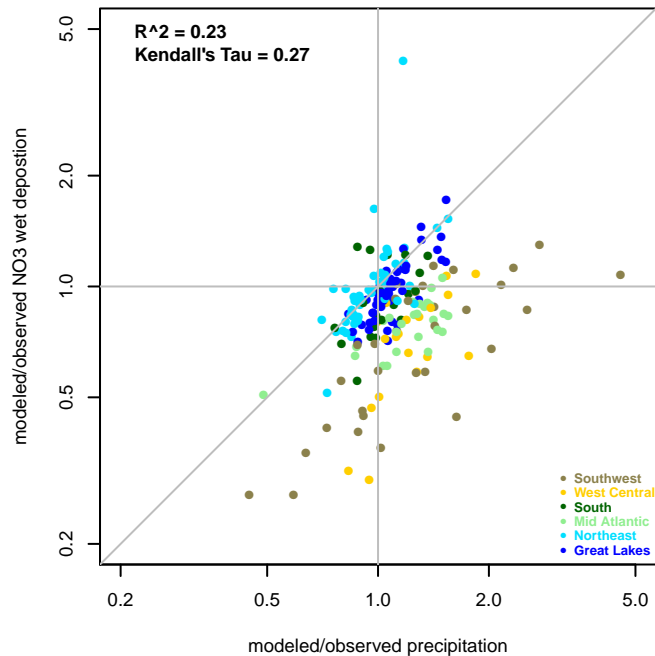

2004 : Observed vs Modeled Wet Dep. NO3

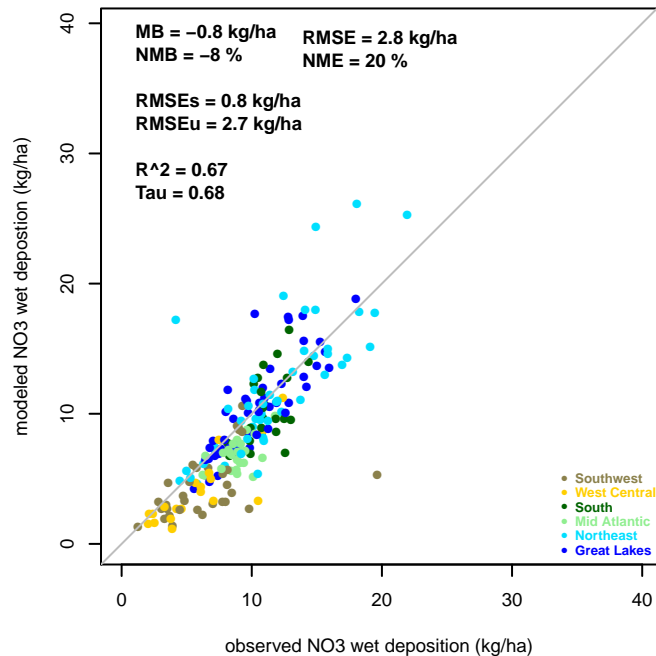

2004 : Observed vs Precip. Adjusted Wet Dep. NO3

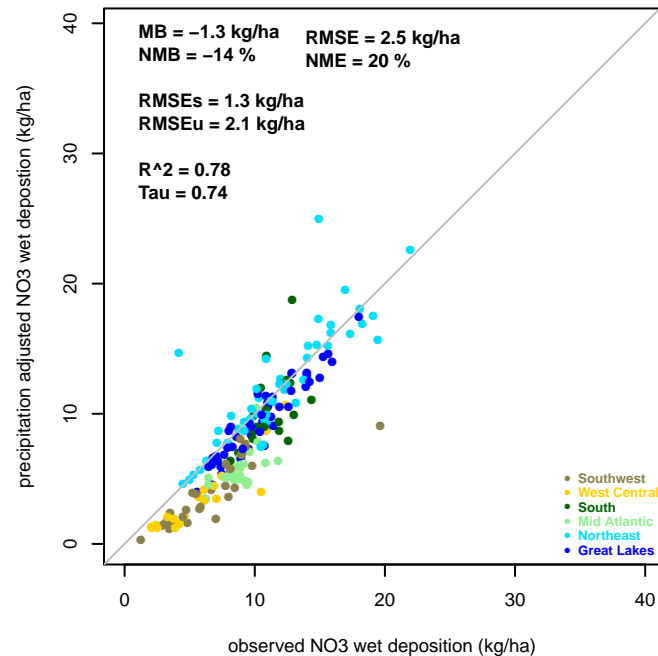

2005 : Modeled/Observed Precip. vs. Wet Dep. NO3

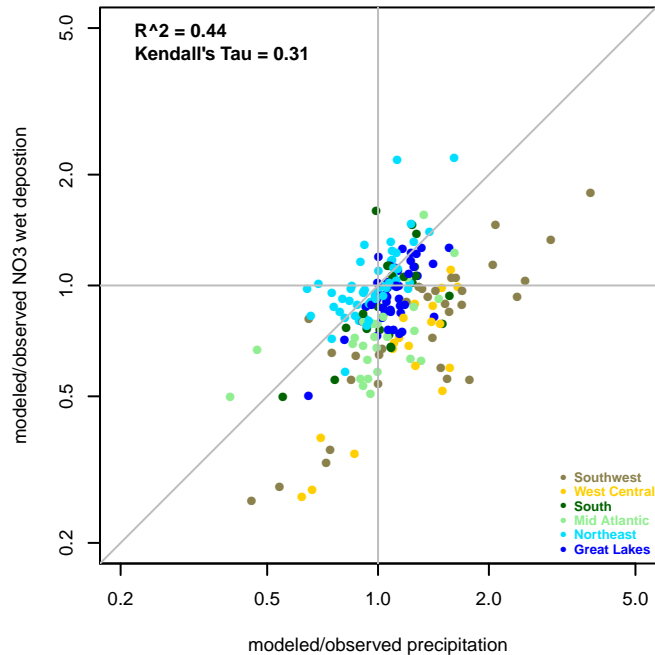

2005 : Observed vs Modeled Wet Dep. NO3

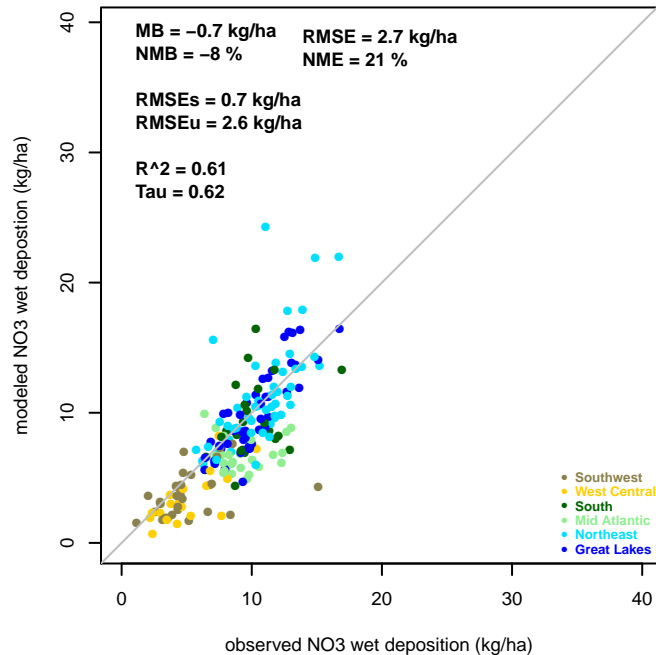

2005 : Observed vs Precip. Adjusted Wet Dep. NO3

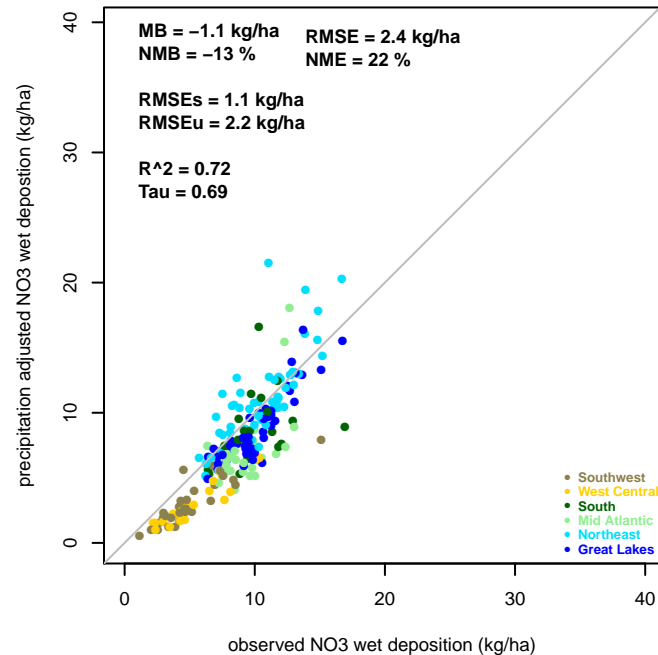

2006 : Modeled/Observed Precip. vs. Wet Dep. NO3

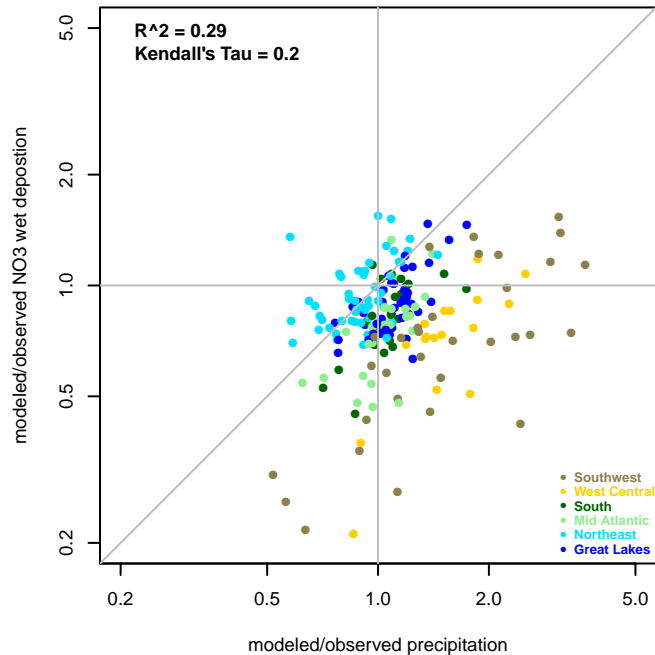

2006 : Observed vs Modeled Wet Dep. NO3

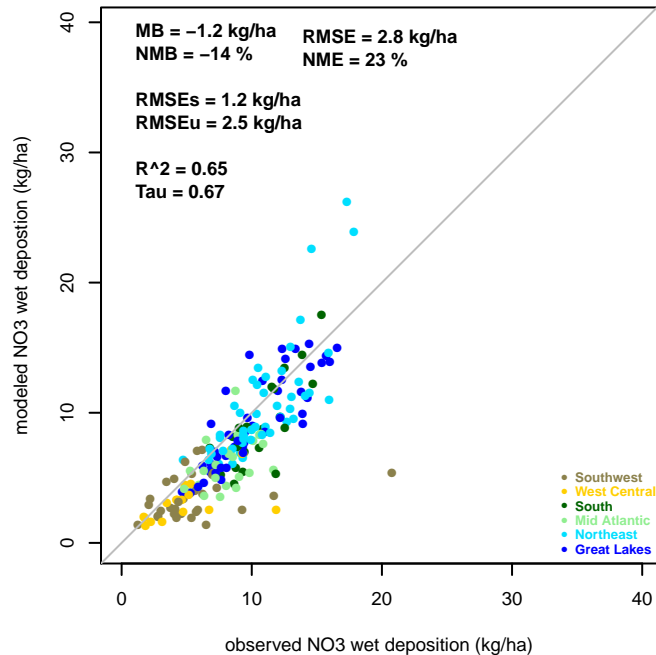

2006 : Observed vs Precip. Adjusted Wet Dep. NO3

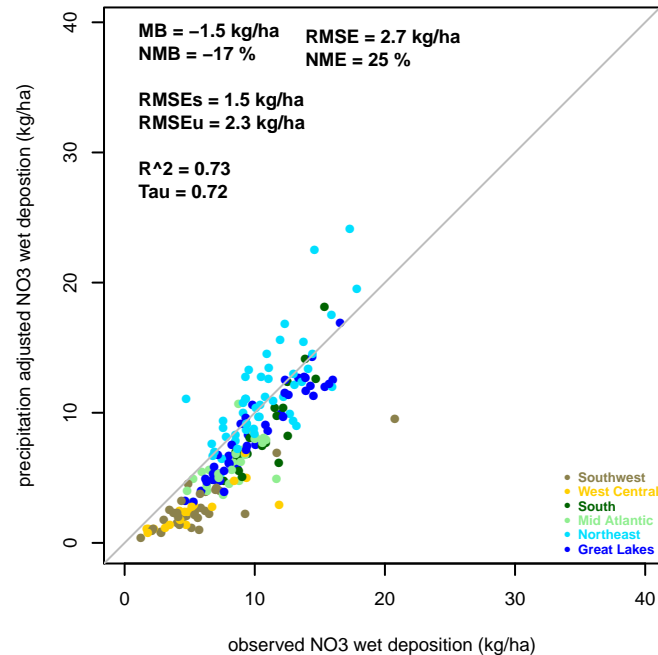

Supplement: Supplementary file 4 [file gmd-4-357-2011-supplement.zip]
