# Supplementary material for: A multi-resolution assessment of the Community Multiscale Air Quality (CMAQ) model v4.7 wet deposition estimates for 2002–2006
Source: Copernicus journal article supplement (doi:10.5194/gmd-4-357-2011), 2011-05-03
Supplement: Supplementary file 1 [file gmd-4-357-2011-supplement.zip]

### Total precipitation, 2002

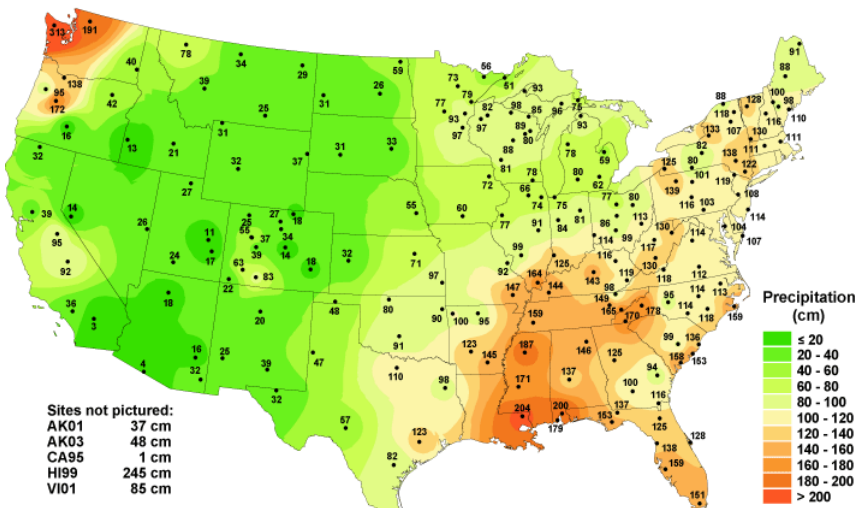

National Atmospheric Deposition Program/National Trends Network  
<http://nadp.sws.uiuc.edu>

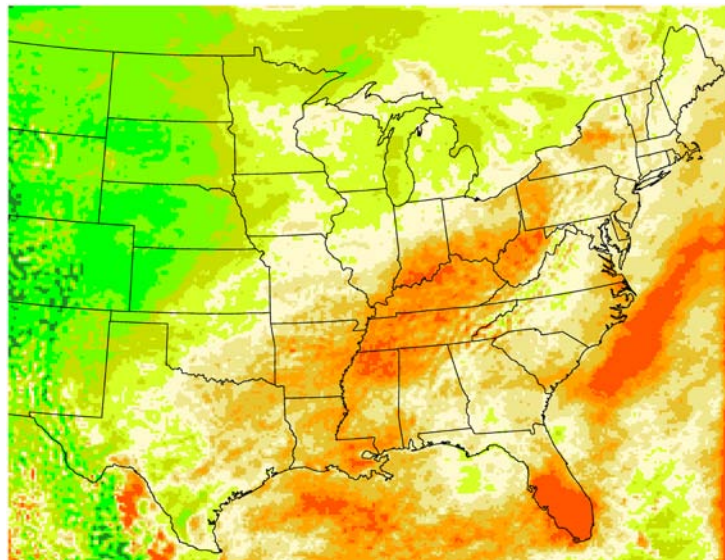

### Total precipitation, 2003

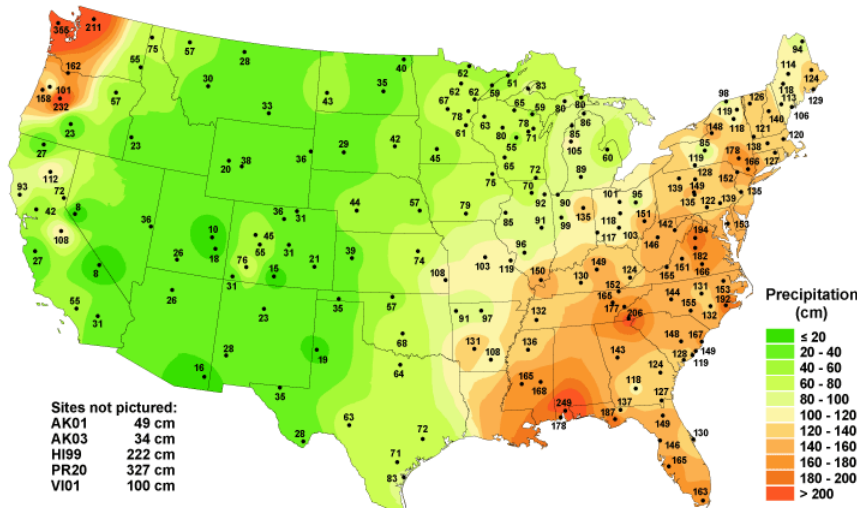

National Atmospheric Deposition Program/National Trends Network  
<http://nadp.sws.uiuc.edu>

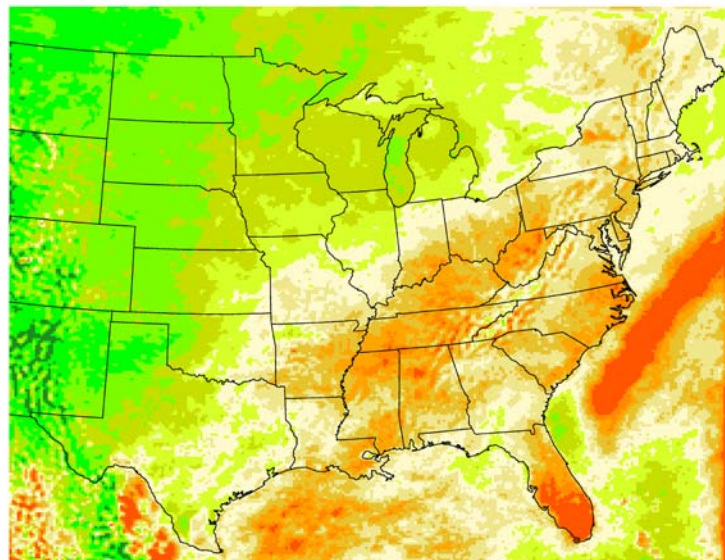

### Total precipitation, 2004

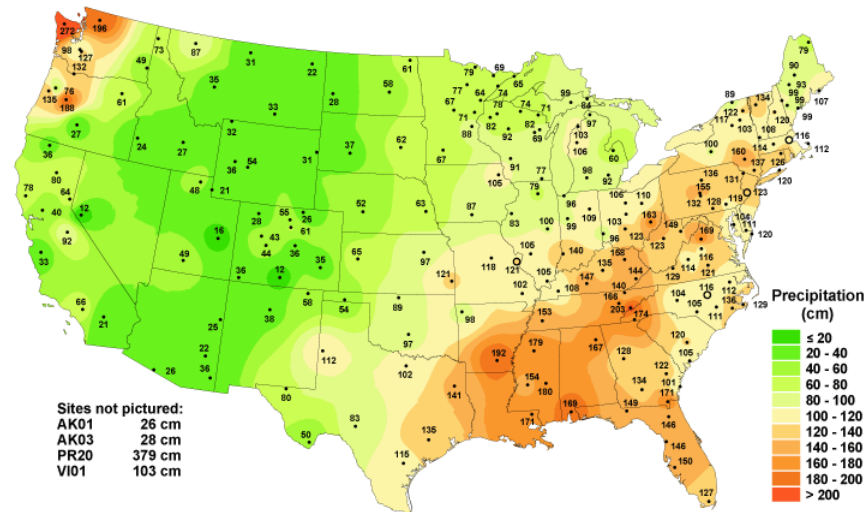

National Atmospheric Deposition Program/National Trends Network  
<http://nadp.sws.uiuc.edu>

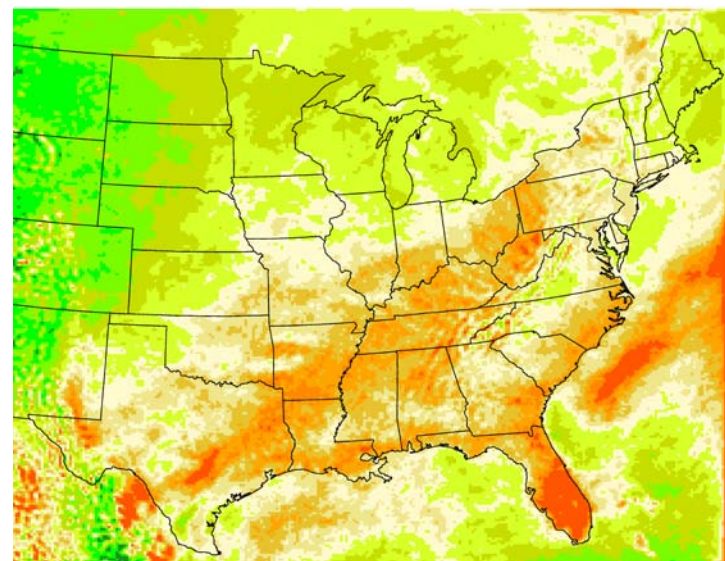

### Total precipitation, 2005

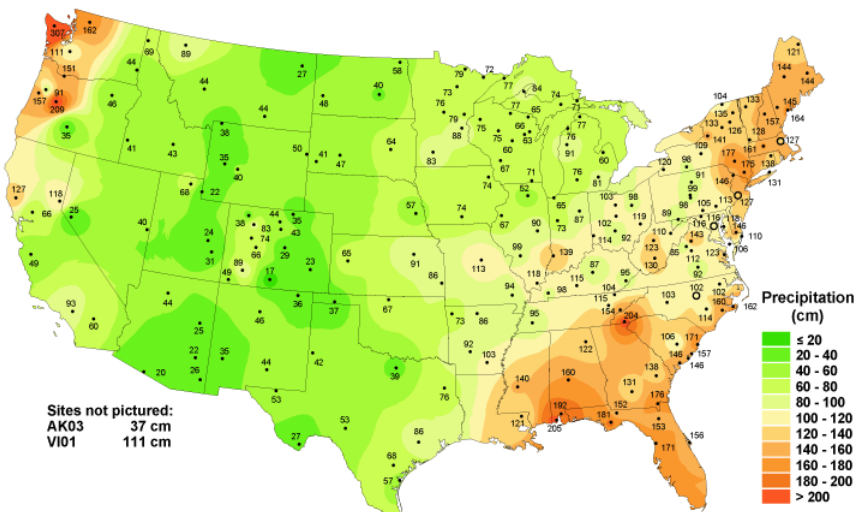

National Atmospheric Deposition Program/National Trends Network  
<http://nadp.sws.uiuc.edu>

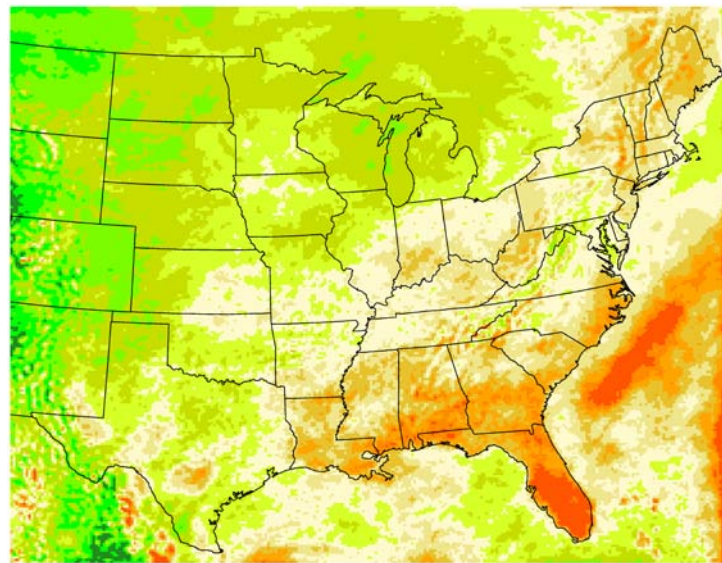

### Total precipitation, 2006

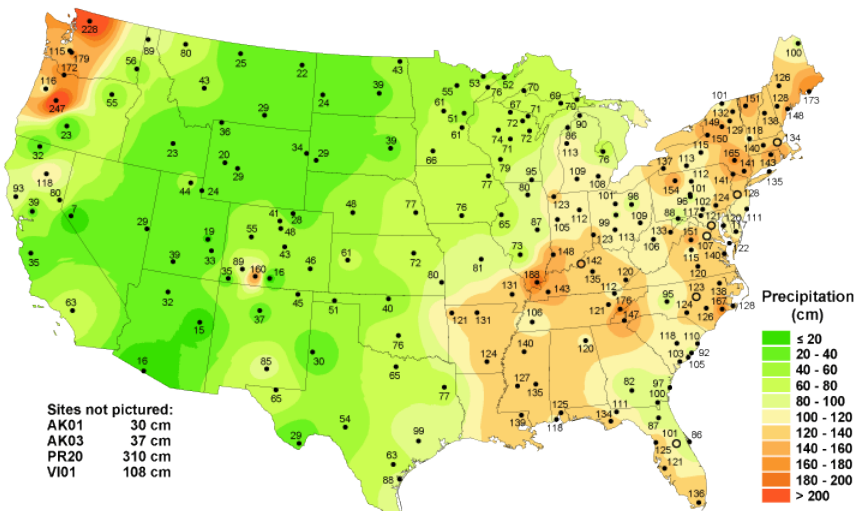

National Atmospheric Deposition Program/National Trends Network  
<http://nadp.sws.uiuc.edu>

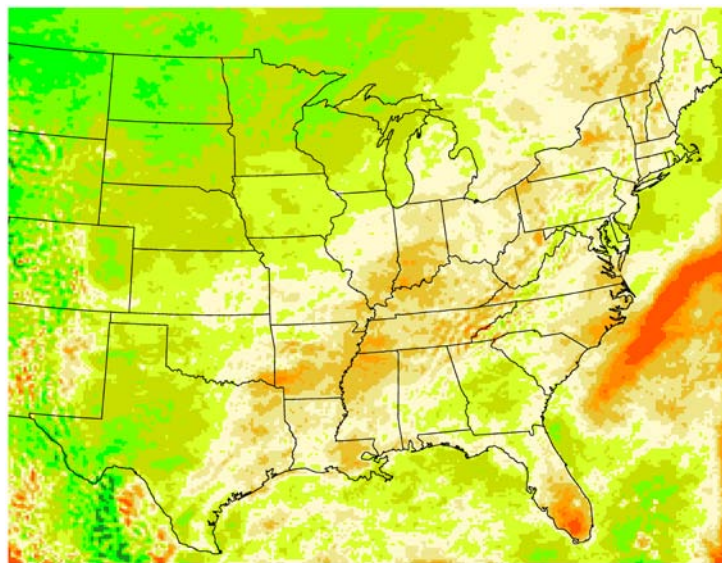

Fig. S1. NTN observed (right) and MM5 estimated (left) precipitation (cm) for 2002 – 2006.

### Sulfate ion wet deposition, 2002

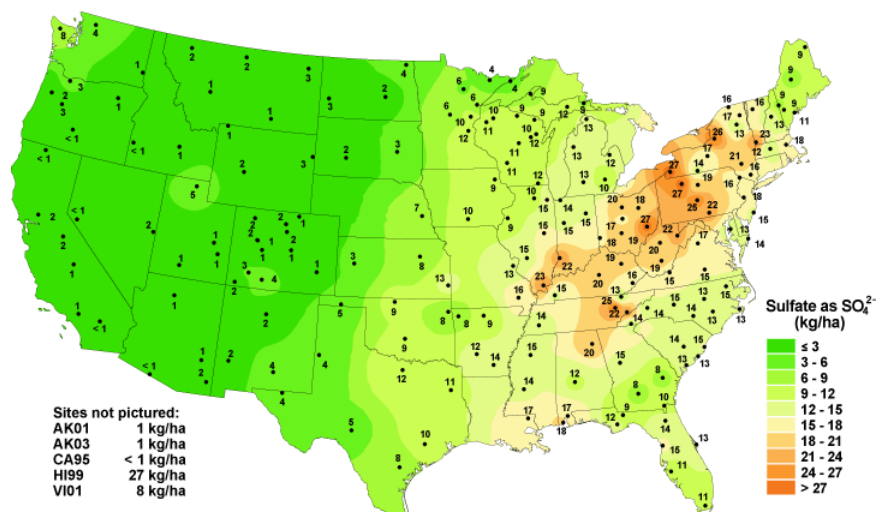

National Atmospheric Deposition Program/National Trends Network  
<http://nadp.sws.uiuc.edu>

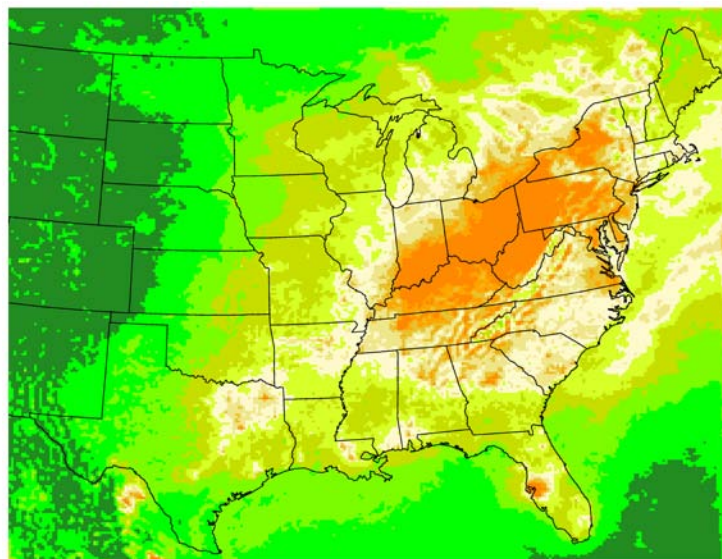

### Sulfate ion wet deposition, 2003

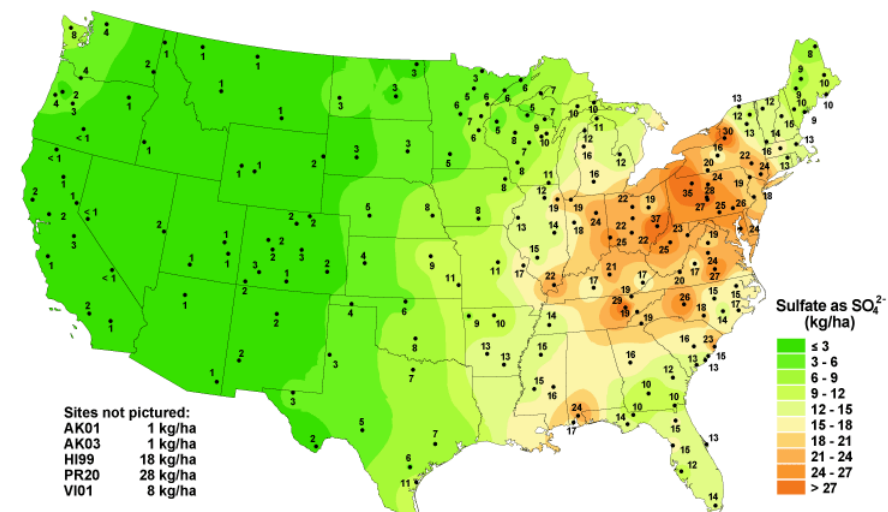

National Atmospheric Deposition Program/National Trends Network  
<http://nadp.sws.uiuc.edu>

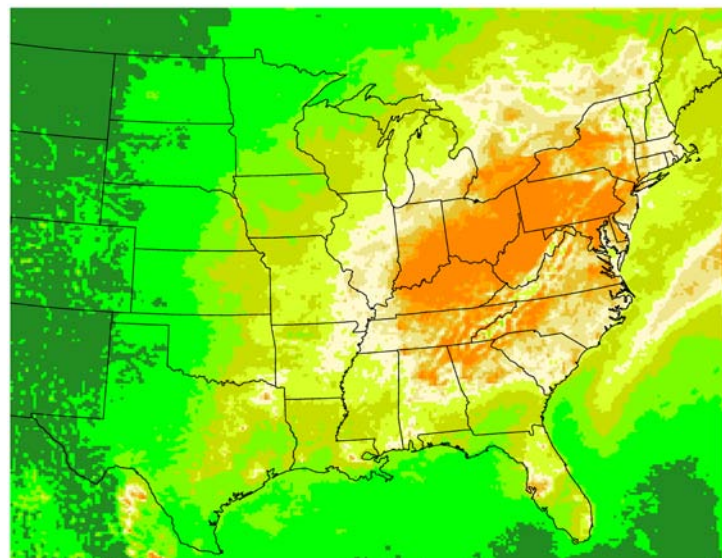

### Sulfate ion wet deposition, 2004

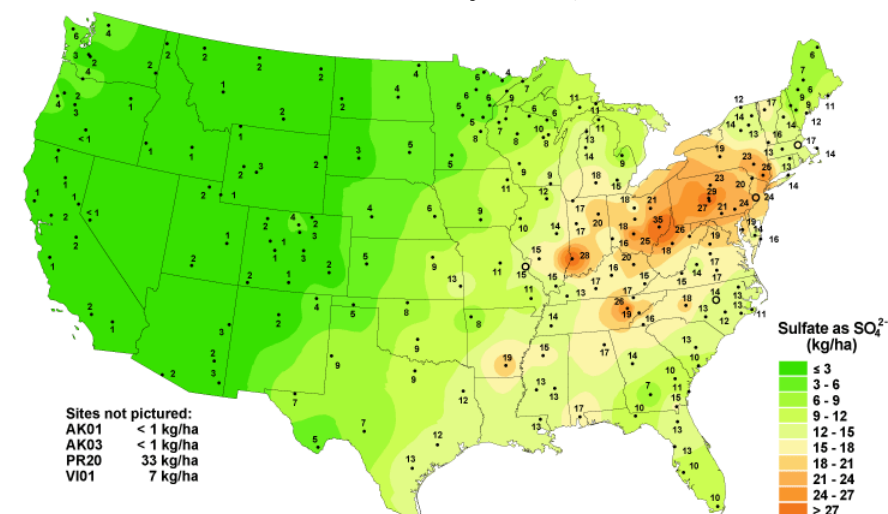

National Atmospheric Deposition Program/National Trends Network  
<http://nadp.sws.uiuc.edu>

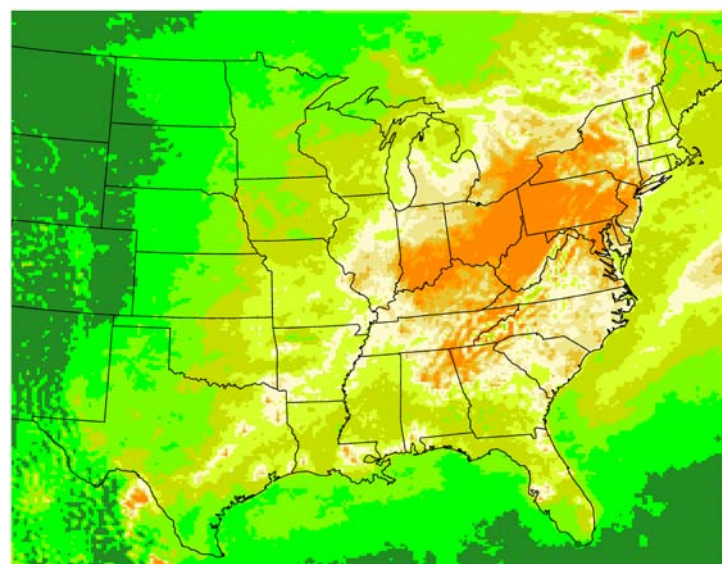

### Sulfate ion wet deposition, 2005

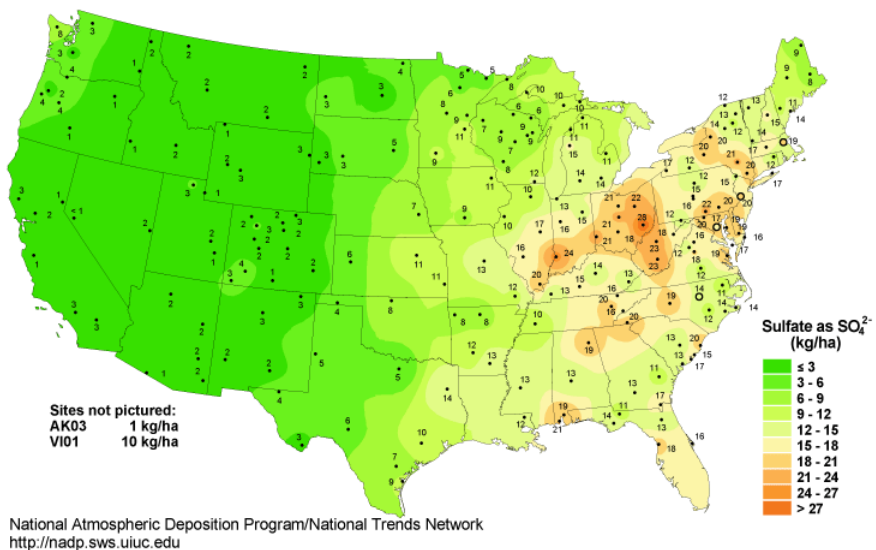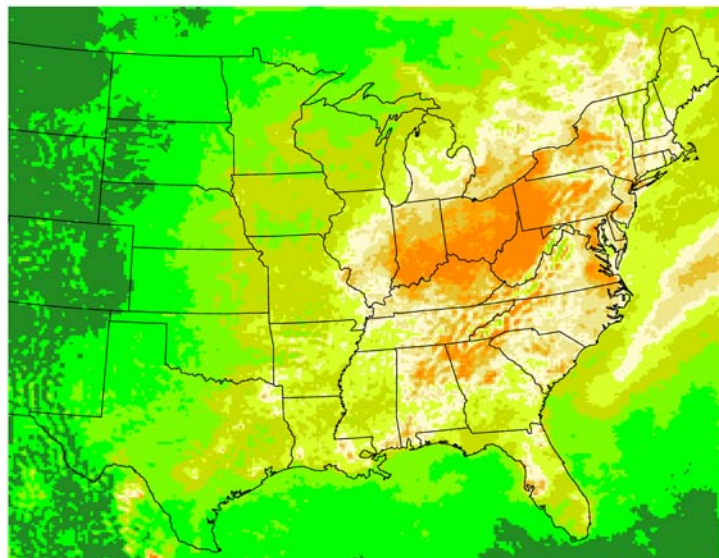

### Sulfate ion wet deposition, 2006

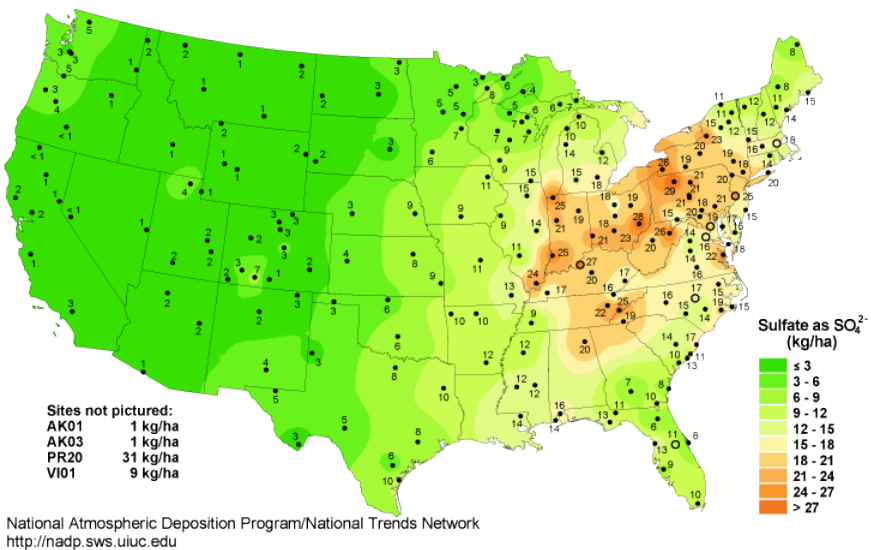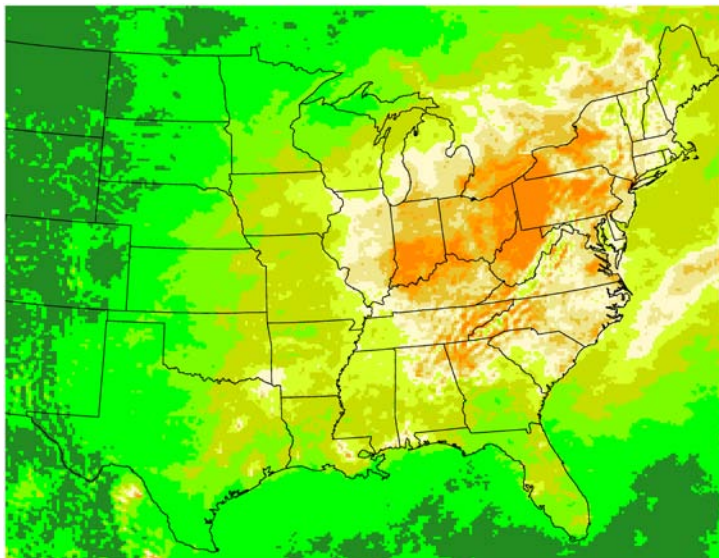

Fig. S2. NTN observed (right) and CMAQ (12-km) estimated (left)  $\text{SO}_4^{2-}$  wet deposition (kg/ha) for 2002 – 2006.

### Ammonium ion wet deposition, 2002

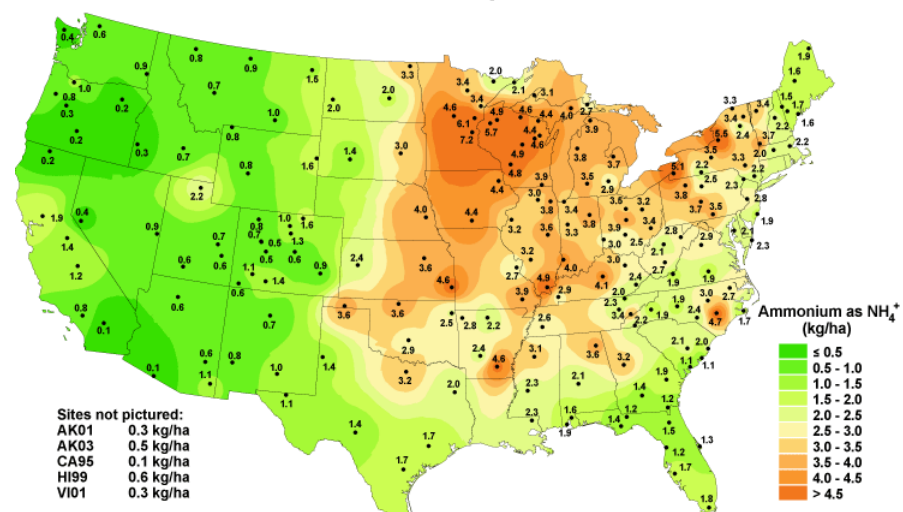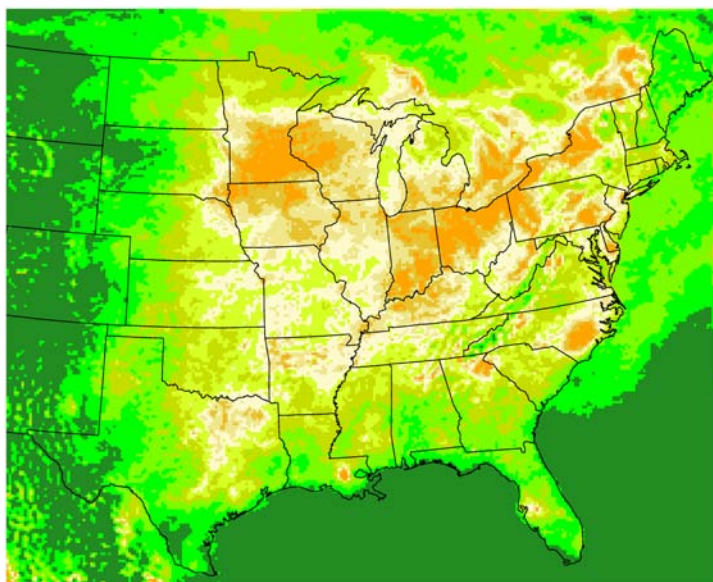

National Atmospheric Deposition Program/National Trends Network  
<http://nadp.sws.uiuc.edu>

### Ammonium ion wet deposition, 2003

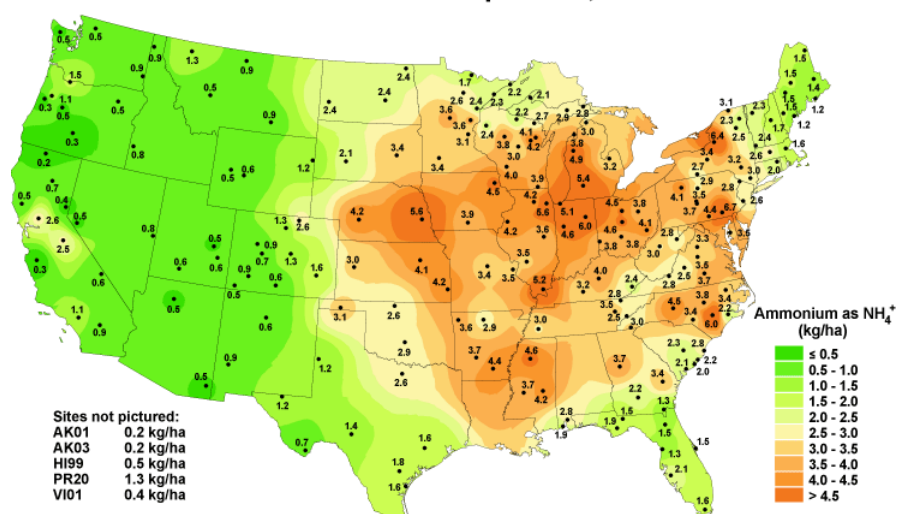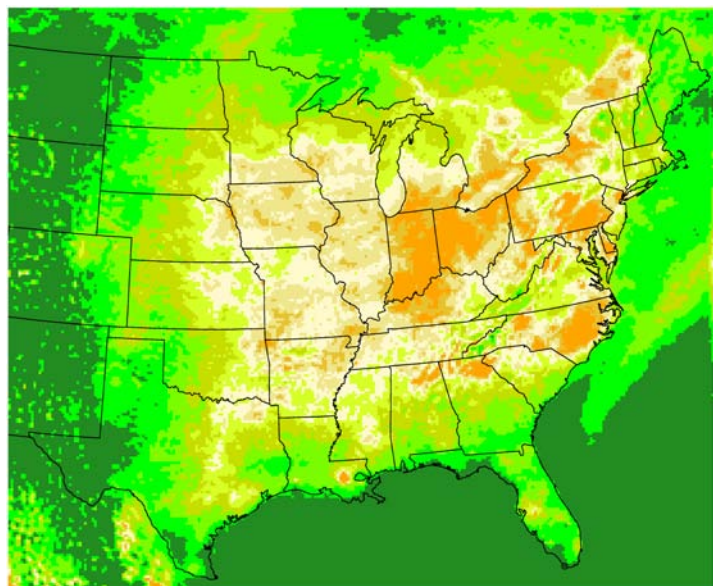

National Atmospheric Deposition Program/National Trends Network  
<http://nadp.sws.uiuc.edu>

### Ammonium ion wet deposition, 2004

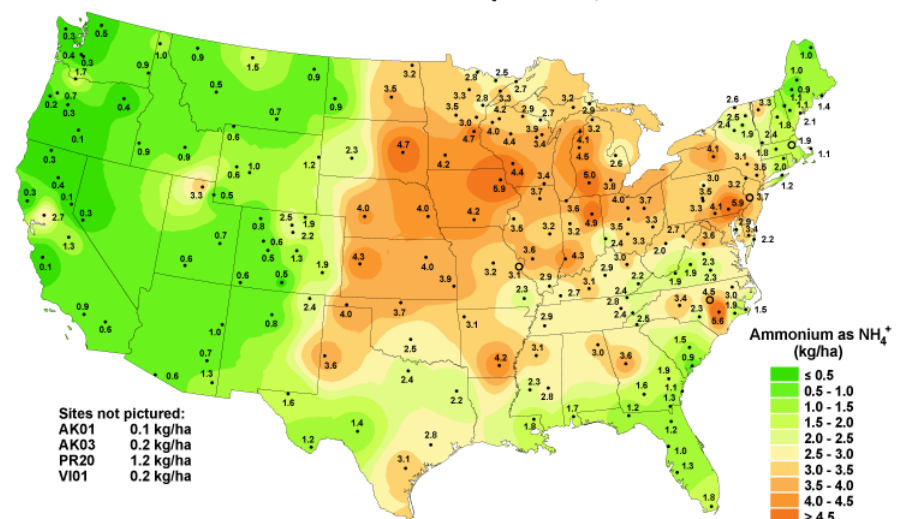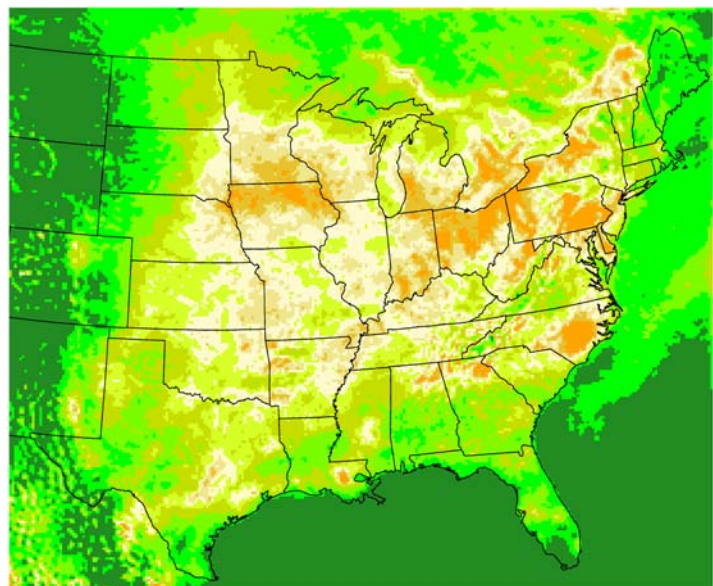

National Atmospheric Deposition Program/National Trends Network  
<http://nadp.sws.uiuc.edu>

**Ammonium ion wet deposition, 2005**

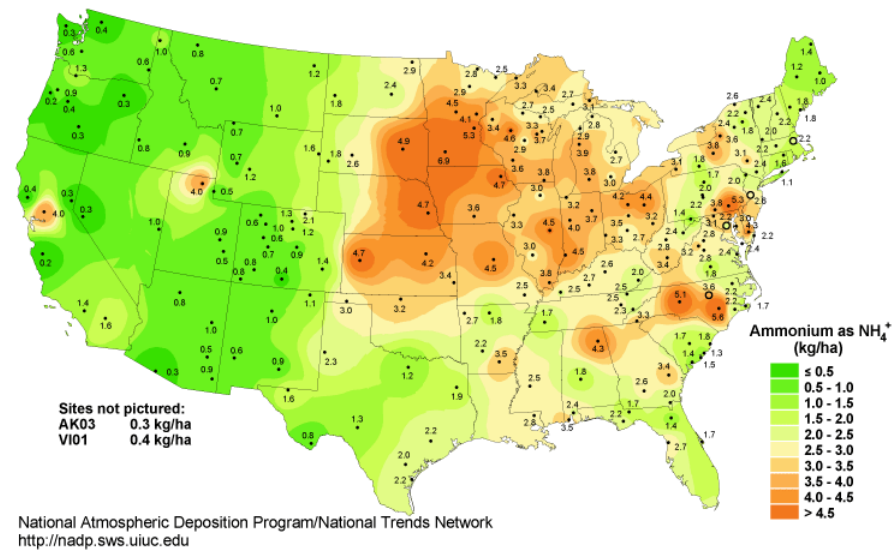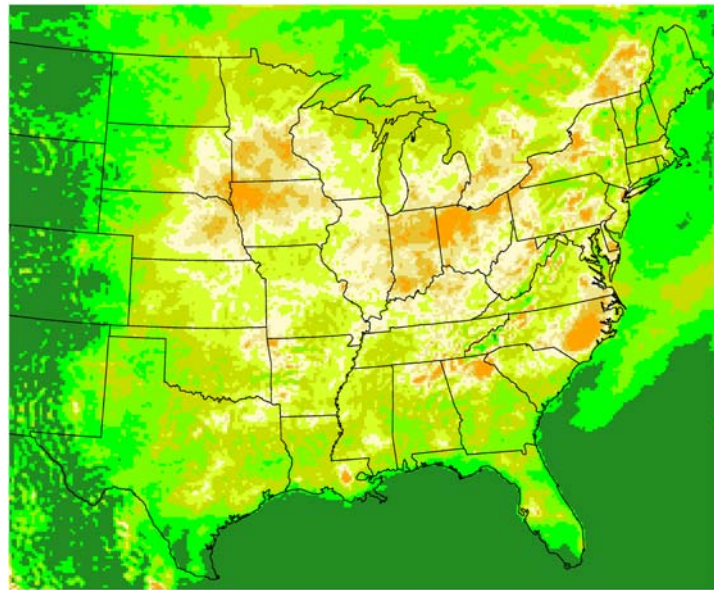

**Ammonium ion wet deposition, 2006**

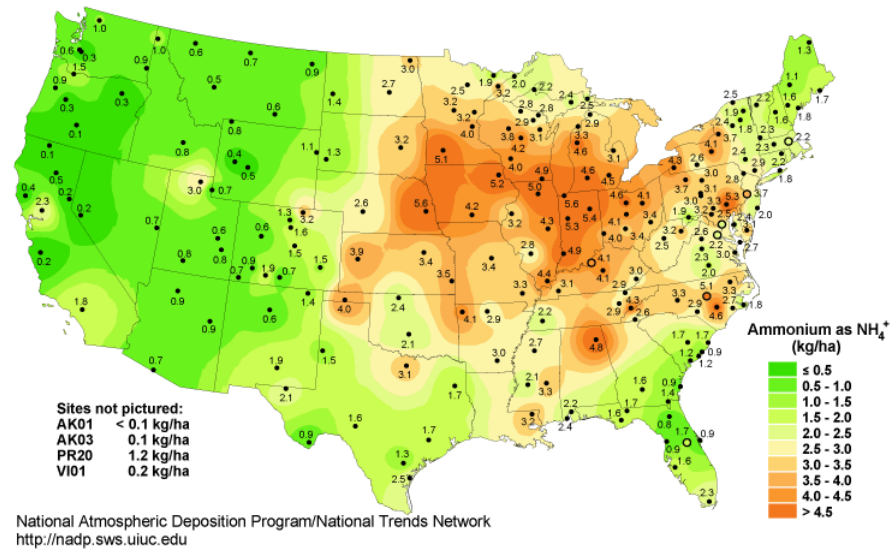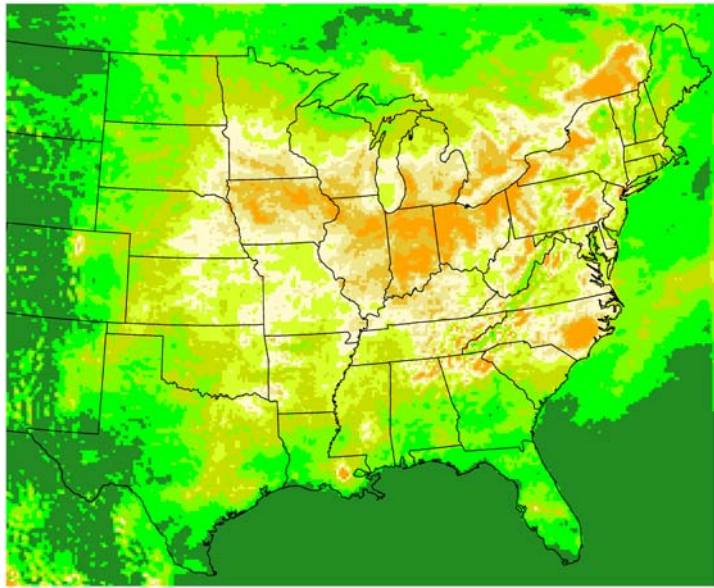

S3. NTN observed (right) and CMAQ (12-km) estimated (left)  $\text{NH}_4^+$  wet deposition (kg/ha) for 2002 – 2006.

### Nitrate ion wet deposition, 2002

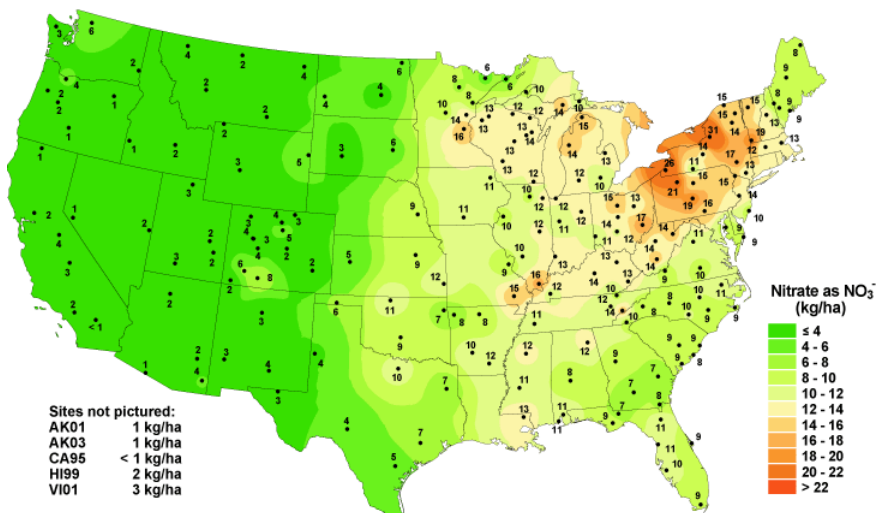

National Atmospheric Deposition Program/National Trends Network  
<http://nadp.sws.uiuc.edu>

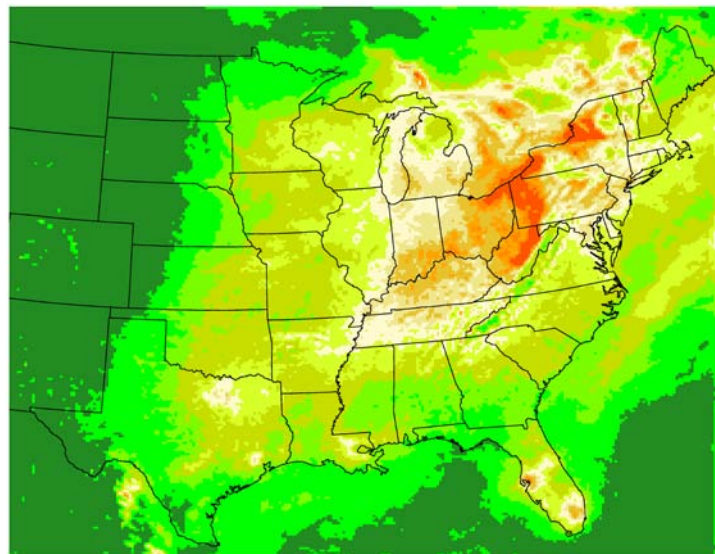

### Nitrate ion wet deposition, 2003

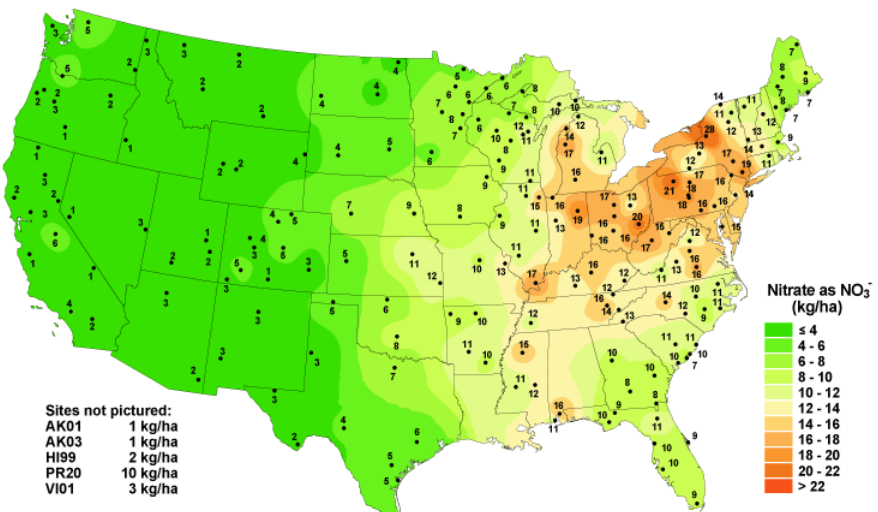

National Atmospheric Deposition Program/National Trends Network  
<http://nadp.sws.uiuc.edu>

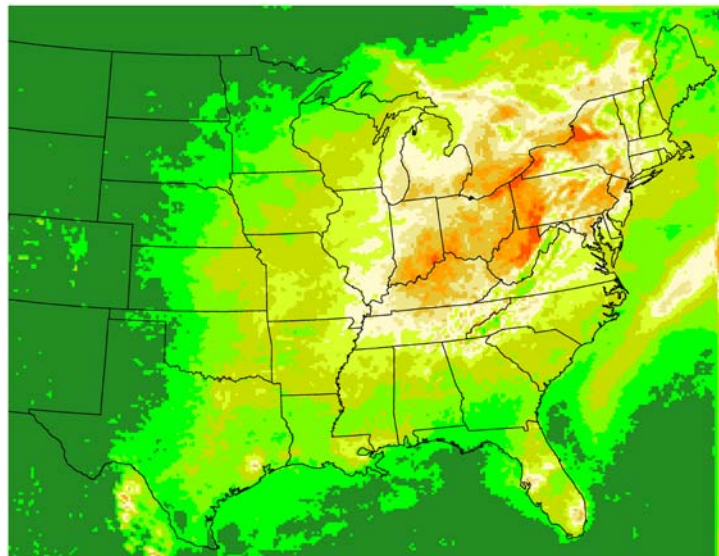

### Nitrate ion wet deposition, 2004

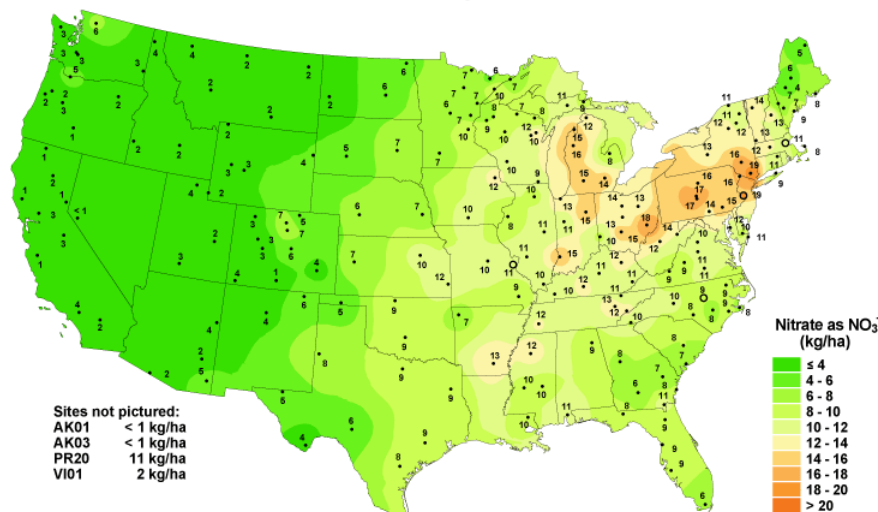

National Atmospheric Deposition Program/National Trends Network  
<http://nadp.sws.uiuc.edu>

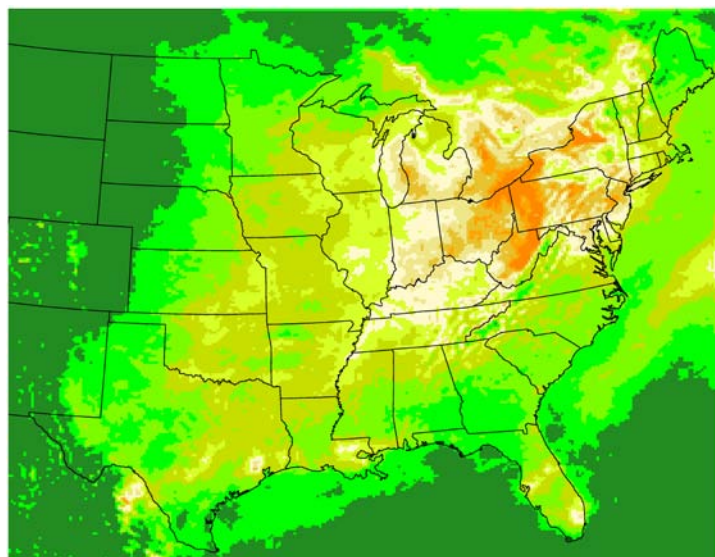

Nitrate ion wet deposition, 2005

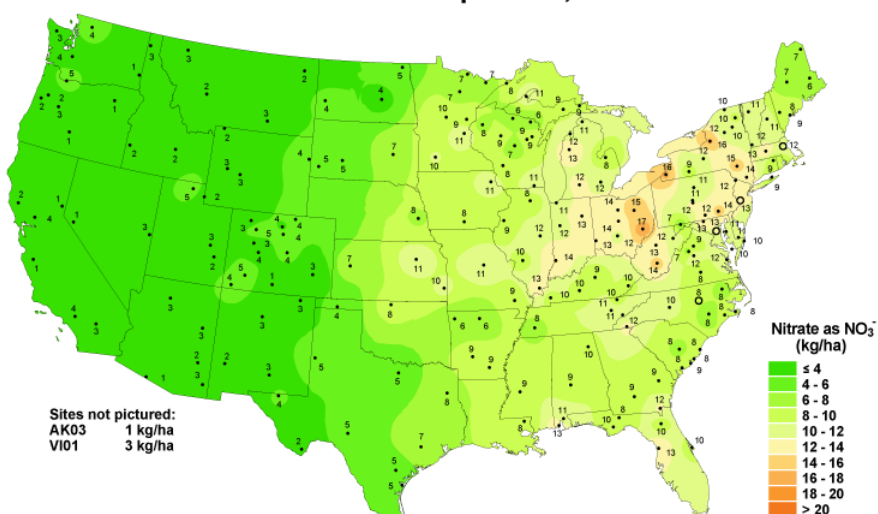

National Atmospheric Deposition Program/National Trends Network  
<http://nadp.sws.uiuc.edu>

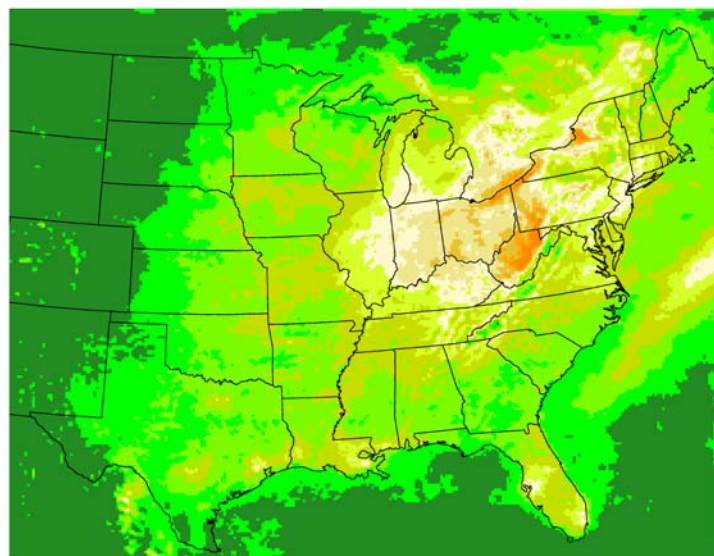

Nitrate ion wet deposition, 2006

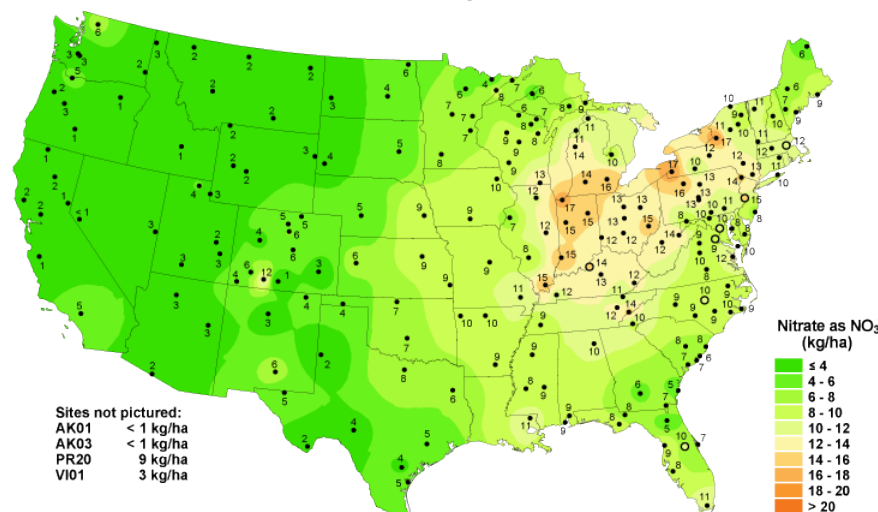

National Atmospheric Deposition Program/National Trends Network  
<http://nadp.sws.uiuc.edu>

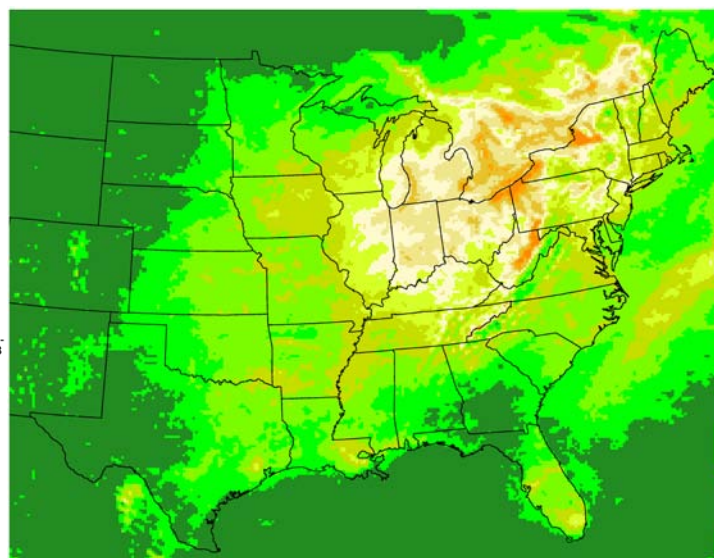

S4. NTN observed (right) and CMAQ (12-km) estimated (left)  $\text{NO}_3^-$  wet deposition (kg/ha) for 2002 – 2006.
