# Supplementary material for: A multi-resolution assessment of the Community Multiscale Air Quality (CMAQ) model v4.7 wet deposition estimates for 2002–2006
Source: Copernicus journal article supplement (doi:10.5194/gmd-4-357-2011), 2011-05-03
Supplement: Supplementary file 5 [file gmd-4-357-2011-supplement.zip]

Table S1. Seasonal and annual RMSE (cm) for precipitation for the 12-km and 36-km CMAQ model simulations.

|               | <b>CMAQ Domain</b> | <b>2002</b> | <b>2003</b> | <b>2004</b> | <b>2005</b> | <b>2006</b> | <b>Five-Year Average</b> |
|---------------|--------------------|-------------|-------------|-------------|-------------|-------------|--------------------------|
| <b>Winter</b> | 12-km              | 7.6         | 7.4         | 6.6         | 7.9         | 5.6         | 7.02                     |
|               | 36-km East         | 7.4         | 7.9         | 6.7         | 5.7         | 6.4         | 6.82                     |
|               | 36-km West         | 14.7        | 11.8        | 11.3        | 7.6         | 11.0        | 11.3                     |
|               |                    |             |             |             |             |             |                          |
| <b>Spring</b> | 12-km              | 8.3         | 9.8         | 8.1         | 8.8         | 7.1         | 8.42                     |
|               | 36-km East         | 7.2         | 9.5         | 7.6         | 8.9         | 7.0         | 8.04                     |
|               | 36-km West         | 7.8         | 14.9        | 7.4         | 10.3        | 10.4        | 10.2                     |
|               |                    |             |             |             |             |             |                          |
| <b>Summer</b> | 12-km              | 18.4        | 13.1        | 17.0        | 15.4        | 13.9        | 15.6                     |
|               | 36-km East         | 17.0        | 13.2        | 14.4        | 13.4        | 11.5        | 13.9                     |
|               | 36-km West         | 11.2        | 9.5         | 9.0         | 9.6         | 4.5         | 8.76                     |
|               |                    |             |             |             |             |             |                          |
| <b>Fall</b>   | 12-km              | 10.8        | 8.7         | 10.9        | 10.6        | 9.5         | 10.1                     |
|               | 36-km East         | 10.4        | 9.4         | 10.1        | 10.8        | 10.5        | 10.2                     |
|               | 36-km West         | 7.9         | 7.8         | 10.1        | 10.0        | 8.0         | 8.76                     |
|               |                    |             |             |             |             |             |                          |
| <b>Annual</b> | 12-km              | 25.9        | 24.0        | 24.2        | 24.4        | 22.8        | 24.3                     |
|               | 36-km East         | 23.2        | 25.3        | 23.6        | 23.2        | 25.1        | 24.1                     |
|               | 36-km West         | 32.5        | 36.1        | 31.7        | 29.1        | 27.1        | 31.3                     |

Table S2. Seasonal and annual RMSE (kg/ha) for  $\text{SO}_4^-$  wet deposition for the 12-km and 36-km CMAQ model simulations.

|               | <b>CMAQ Domain</b> | <b>2002</b> | <b>2003</b> | <b>2004</b> | <b>2005</b> | <b>2006</b> | <b>Five-Year Average</b> |
|---------------|--------------------|-------------|-------------|-------------|-------------|-------------|--------------------------|
| <b>Winter</b> | 12-km              | 0.93        | 0.75        | 0.96        | 1.21        | 0.75        | 0.92                     |
|               | 36-km East         | 0.72        | 0.64        | 0.74        | 0.71        | 0.64        | 0.69                     |
|               | 36-km West         | 0.33        | 0.29        | 0.30        | 0.21        | 0.27        | 0.28                     |
|               |                    |             |             |             |             |             |                          |
| <b>Spring</b> | 12-km              | 1.21        | 1.49        | 1.37        | 1.30        | 0.96        | 1.27                     |
|               | 36-km East         | 1.05        | 1.35        | 1.18        | 1.19        | 0.84        | 1.12                     |
|               | 36-km West         | 0.45        | 0.40        | 0.30        | 0.34        | 0.34        | 0.37                     |
|               |                    |             |             |             |             |             |                          |
| <b>Summer</b> | 12-km              | 1.90        | 1.95        | 2.07        | 1.66        | 1.72        | 1.86                     |
|               | 36-km East         | 1.88        | 1.89        | 1.77        | 1.63        | 1.70        | 1.77                     |
|               | 36-km West         | 0.26        | 0.30        | 0.27        | 0.24        | 0.20        | 0.25                     |
|               |                    |             |             |             |             |             |                          |
| <b>Fall</b>   | 12-km              | 1.33        | 1.03        | 1.13        | 1.09        | 1.12        | 1.14                     |
|               | 36-km East         | 1.20        | 0.97        | 0.85        | 1.00        | 1.04        | 1.01                     |
|               | 36-km West         | 0.22        | 0.26        | 0.23        | 0.27        | 0.22        | 0.24                     |
|               |                    |             |             |             |             |             |                          |
| <b>Annual</b> | 12-km              | 3.85        | 3.59        | 3.79        | 3.62        | 2.94        | 3.56                     |
|               | 36-km East         | 3.14        | 3.36        | 3.25        | 2.94        | 2.82        | 3.10                     |
|               | 36-km West         | 0.82        | 0.94        | 0.83        | 0.71        | 0.82        | 0.82                     |

Table S3. Seasonal and annual RMSE (kg/ha) for  $\text{NH}_4^+$  wet deposition for the 12-km and 36-km CMAQ model simulations.

|               | <b>CMAQ Domain</b> | <b>2002</b> | <b>2003</b> | <b>2004</b> | <b>2005</b> | <b>2006</b> | <b>Five-Year Average</b> |
|---------------|--------------------|-------------|-------------|-------------|-------------|-------------|--------------------------|
| <b>Winter</b> | 12-km              | 0.15        | 0.14        | 0.24        | 0.15        | 0.15        | 0.17                     |
|               | 36-km East         | 0.14        | 0.13        | 0.23        | 0.10        | 0.14        | 0.15                     |
|               | 36-km West         | 0.11        | 0.16        | 0.21        | 0.14        | 0.11        | 0.15                     |
|               |                    |             |             |             |             |             |                          |
| <b>Spring</b> | 12-km              | 0.34        | 0.49        | 0.37        | 0.41        | 0.31        | 0.38                     |
|               | 36-km East         | 0.35        | 0.49        | 0.37        | 0.41        | 0.30        | 0.38                     |
|               | 36-km West         | 0.16        | 0.26        | 0.16        | 0.20        | 0.24        | 0.20                     |
|               |                    |             |             |             |             |             |                          |
| <b>Summer</b> | 12-km              | 0.44        | 0.45        | 0.41        | 0.41        | 0.45        | 0.43                     |
|               | 36-km East         | 0.44        | 0.42        | 0.41        | 0.42        | 0.45        | 0.43                     |
|               | 36-km West         | 0.12        | 0.22        | 0.15        | 0.14        | 0.15        | 0.16                     |
|               |                    |             |             |             |             |             |                          |
| <b>Fall</b>   | 12-km              | 0.22        | 0.17        | 0.20        | 0.22        | 0.22        | 0.21                     |
|               | 36-km East         | 0.21        | 0.17        | 0.20        | 0.22        | 0.22        | 0.20                     |
|               | 36-km West         | 0.14        | 0.14        | 0.20        | 0.14        | 0.16        | 0.16                     |
|               |                    |             |             |             |             |             |                          |
| <b>Annual</b> | 12-km              | 0.76        | 0.86        | 0.82        | 0.80        | 0.77        | 0.80                     |
|               | 36-km East         | 0.74        | 0.84        | 0.82        | 0.78        | 0.79        | 0.79                     |
|               | 36-km West         | 0.36        | 0.56        | 0.53        | 0.49        | 0.46        | 0.48                     |

Table S4. Seasonal and annual RMSE (kg/ha) for NO<sub>3</sub><sup>-</sup> wet deposition for the 12-km and 36-km CMAQ model simulations.

|               | <b>CMAQ Domain</b> | <b>2002</b> | <b>2003</b> | <b>2004</b> | <b>2005</b> | <b>2006</b> | <b>Five-Year Average</b> |
|---------------|--------------------|-------------|-------------|-------------|-------------|-------------|--------------------------|
| <b>Winter</b> | 12-km              | 1.10        | 0.86        | 1.10        | 1.14        | 0.81        | 1.00                     |
|               | 36-km East         | 0.90        | 0.80        | 0.80        | 0.67        | 0.68        | 0.77                     |
|               | 36-km West         | 0.26        | 0.32        | 0.39        | 0.28        | 0.34        | 0.32                     |
|               |                    |             |             |             |             |             |                          |
| <b>Spring</b> | 12-km              | 0.83        | 1.02        | 0.90        | 0.90        | 0.76        | 0.88                     |
|               | 36-km East         | 0.88        | 1.08        | 0.98        | 0.97        | 0.83        | 0.95                     |
|               | 36-km West         | 0.26        | 0.45        | 0.22        | 0.37        | 0.61        | 0.38                     |
|               |                    |             |             |             |             |             |                          |
| <b>Summer</b> | 12-km              | 1.56        | 1.55        | 1.40        | 1.27        | 1.54        | 1.46                     |
|               | 36-km East         | 1.62        | 1.64        | 1.48        | 1.34        | 1.62        | 1.54                     |
|               | 36-km West         | 0.46        | 0.49        | 0.50        | 0.35        | 0.55        | 0.47                     |
|               |                    |             |             |             |             |             |                          |
| <b>Fall</b>   | 12-km              | 1.10        | 0.74        | 0.80        | 0.59        | 0.69        | 0.78                     |
|               | 36-km East         | 0.91        | 0.75        | 0.72        | 0.56        | 0.70        | 0.73                     |
|               | 36-km West         | 0.31        | 0.31        | 0.32        | 0.26        | 0.26        | 0.29                     |
|               |                    |             |             |             |             |             |                          |
| <b>Annual</b> | 12-km              | 2.76        | 2.63        | 2.45        | 2.43        | 2.42        | 2.54                     |
|               | 36-km East         | 2.75        | 2.95        | 2.62        | 2.40        | 2.76        | 2.70                     |
|               | 36-km West         | 0.80        | 1.11        | 1.00        | 0.90        | 1.19        | 1.00                     |
