# Supplementary material for: A multi-resolution assessment of the Community Multiscale Air Quality (CMAQ) model v4.7 wet deposition estimates for 2002–2006
Source: Copernicus journal article supplement (doi:10.5194/gmd-4-357-2011), 2011-05-03
Supplement: Supplementary file 6 [file gmd-4-357-2011-supplement.zip]

Archive with 7 entries (7 files):
- Figure S8.pdf
- Figures S1-S4.pdf
- Tables S1-S4.doc.pdf
- Figure S5.pdf
- Figure S6.pdf
- Figure S7.pdf
- Bi_directional_exchanged_mech.pdf
