# Supplementary figures and images for: A multi-resolution assessment of the Community Multiscale Air Quality (CMAQ) model v4.7 wet deposition estimates for 2002–2006
Source: Copernicus journal article supplement (doi:10.5194/gmd-4-357-2011), 2011-05-03

Figure. S5.

Region definitions for precipitation bias adjustment.

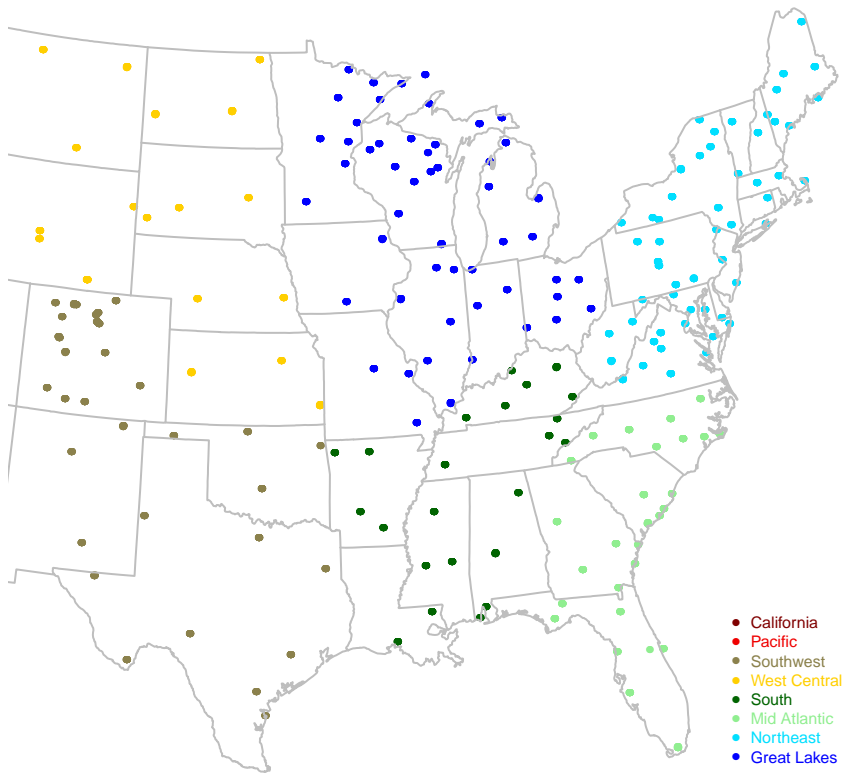

Supplement: Supplementary file 2 [file gmd-4-357-2011-supplement.zip]
